# Supplementary material
Source: PubMed Central journal article supplement (PMC2867374)

Figure S1

**A**

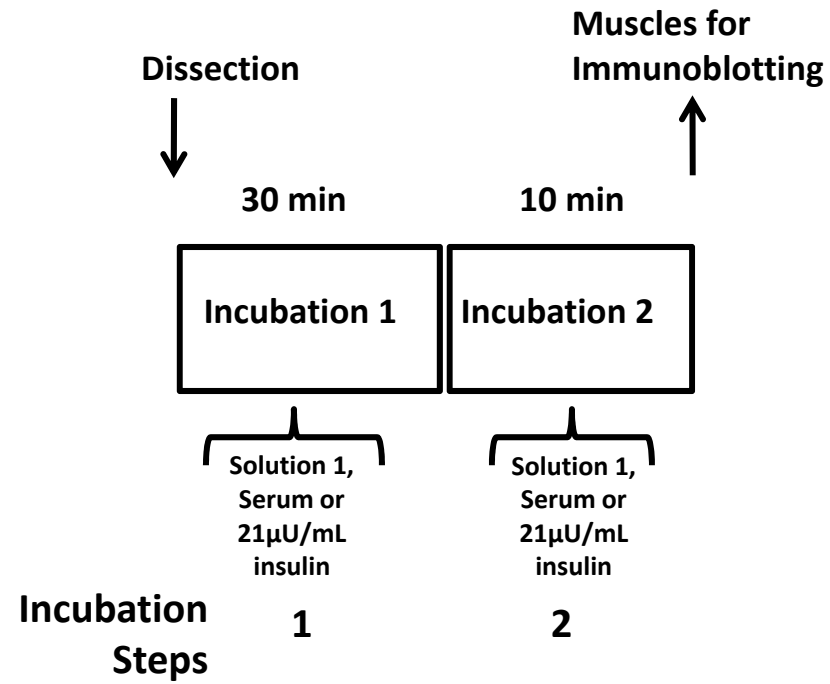

**B**

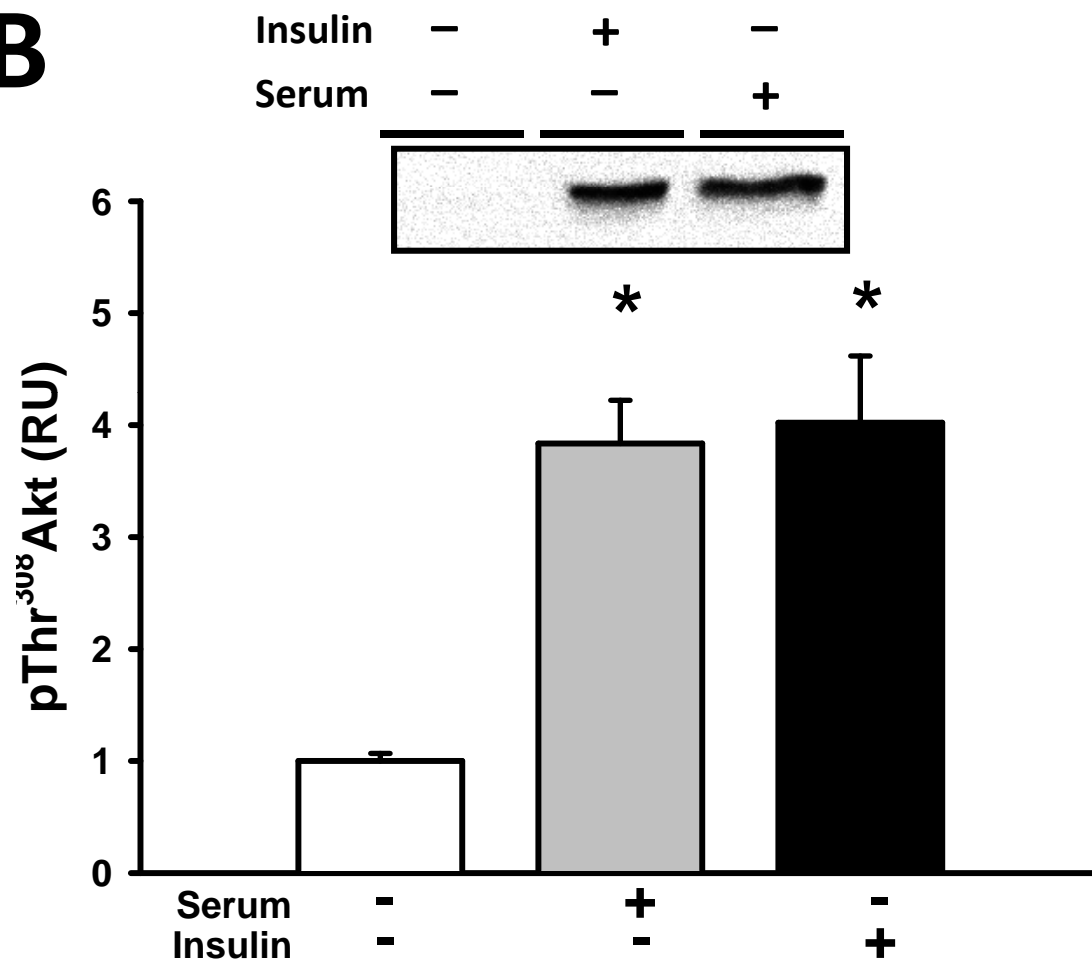

**C**

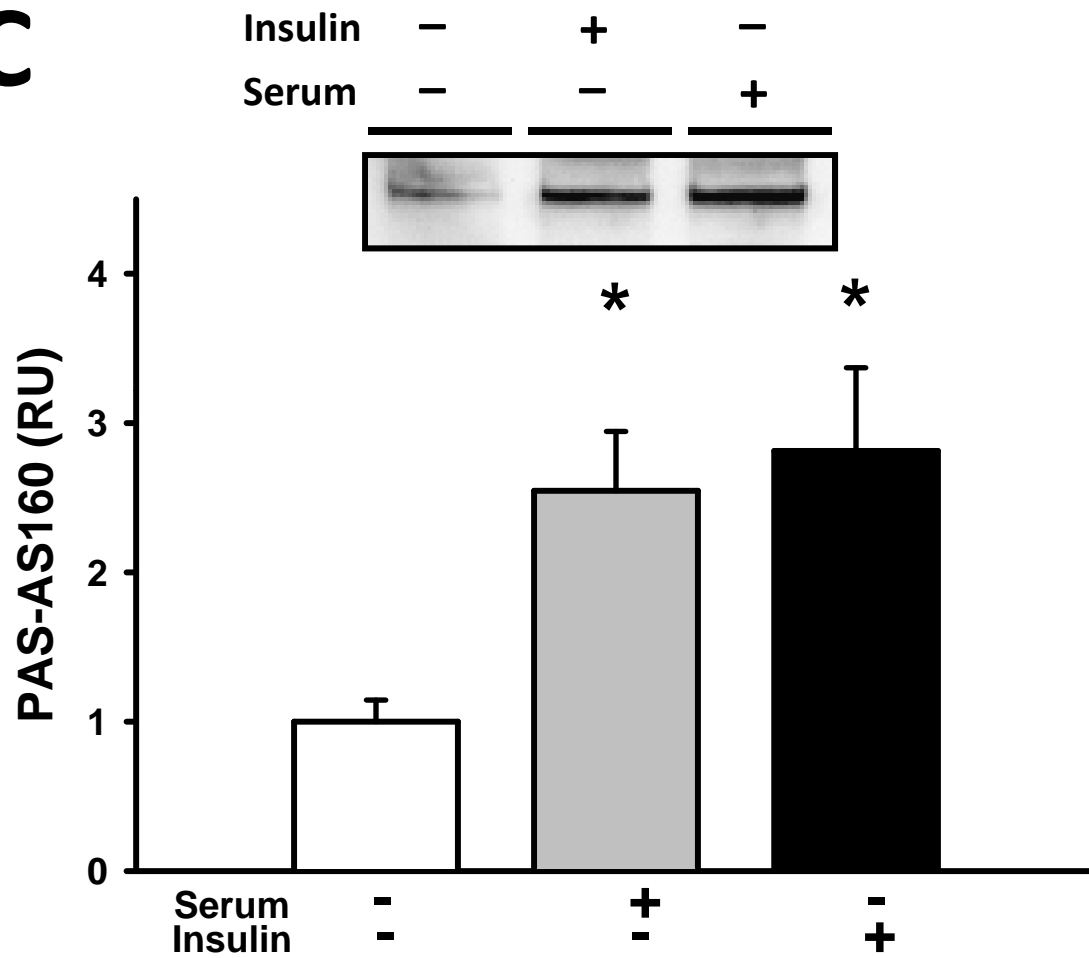

**D**

|         |   |   |   |
|---------|---|---|---|
| Insulin | - | + | - |
| Serum   | - | - | + |

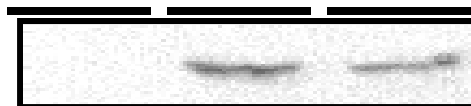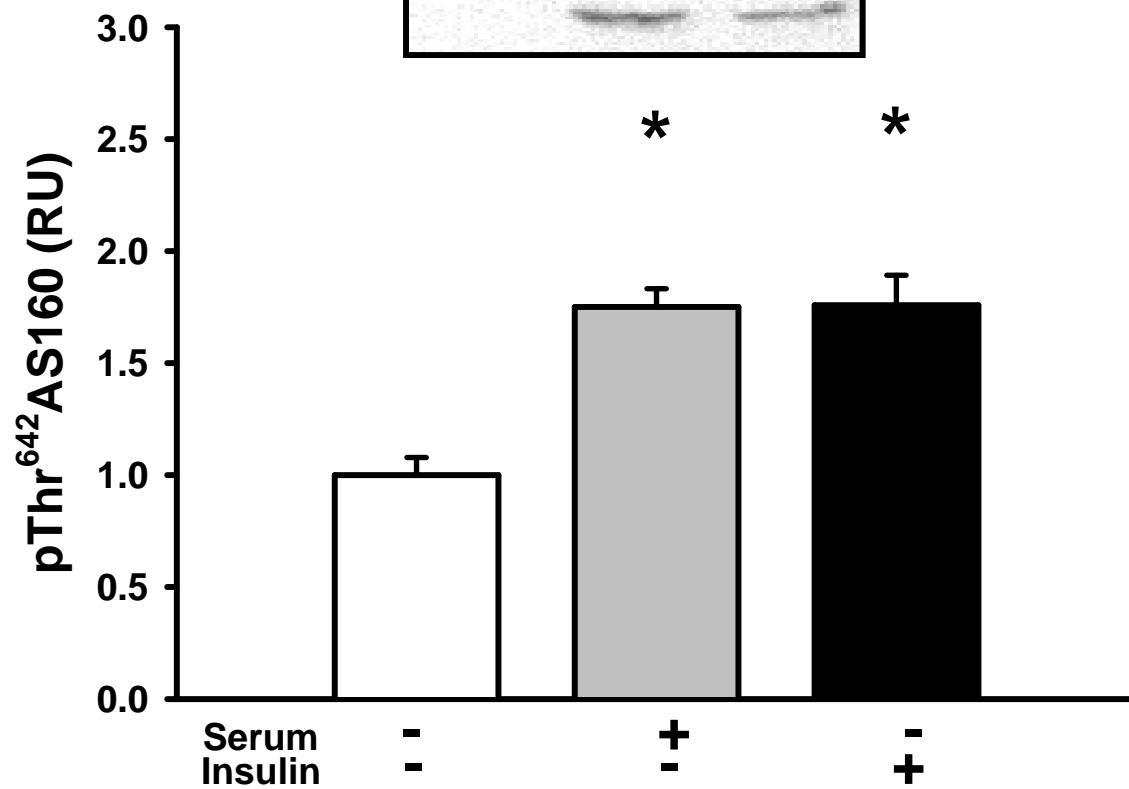

**F**

|         |   |   |   |
|---------|---|---|---|
| Insulin | - | + | - |
| Serum   | - | - | + |

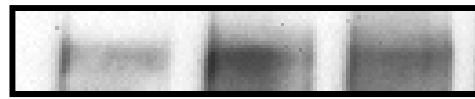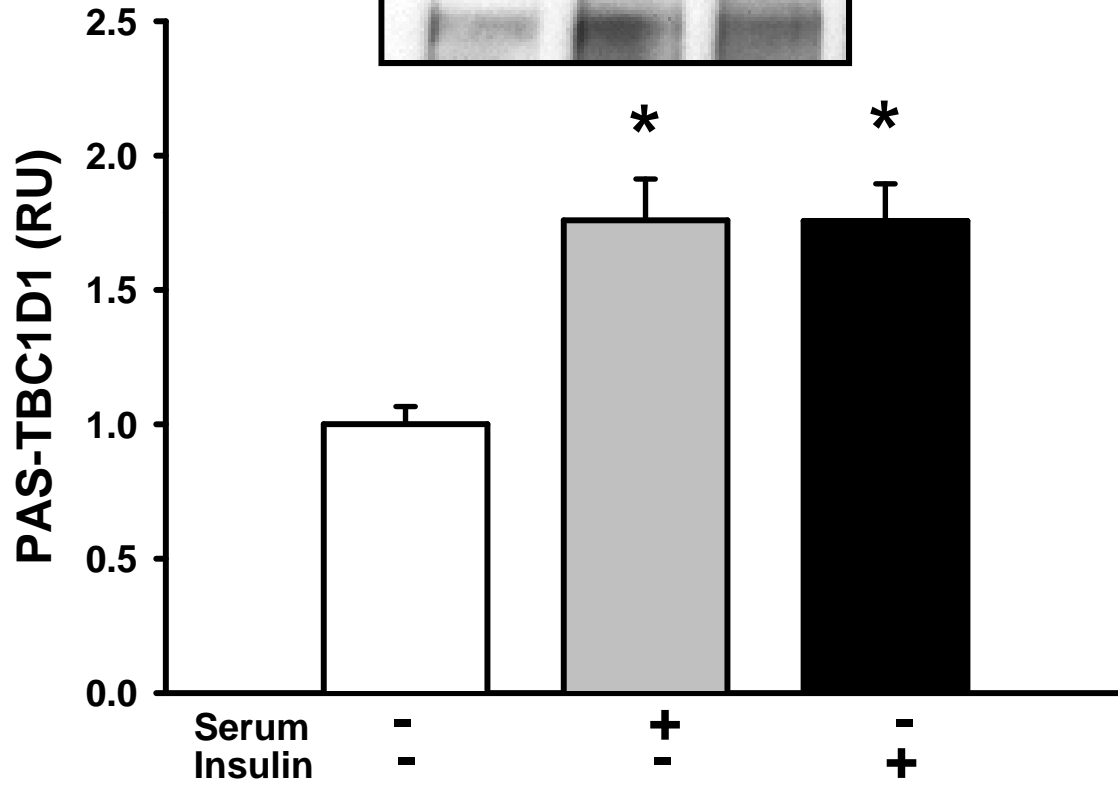

Figure S2

# A

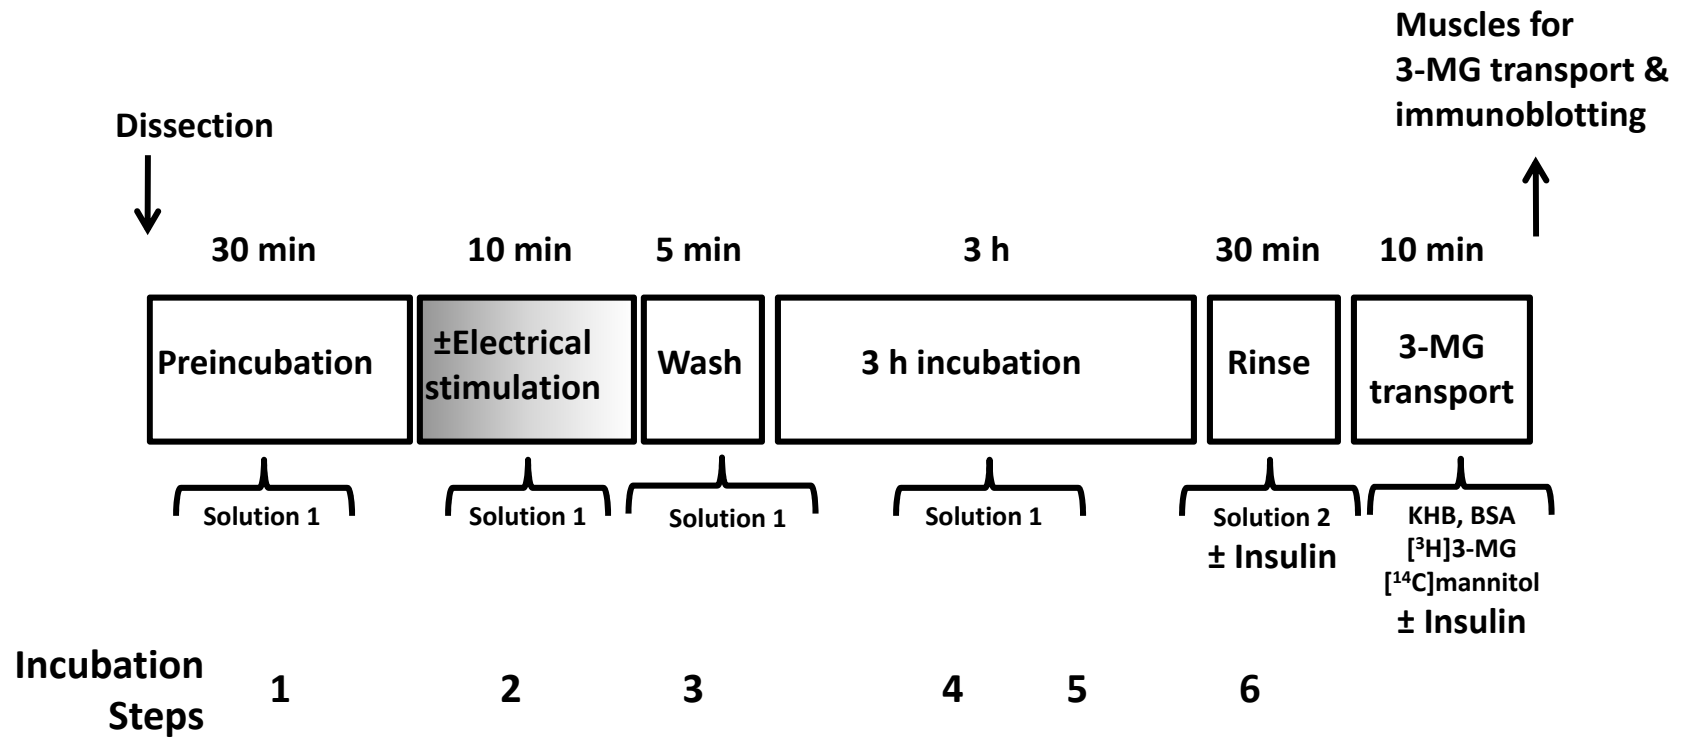



**B**

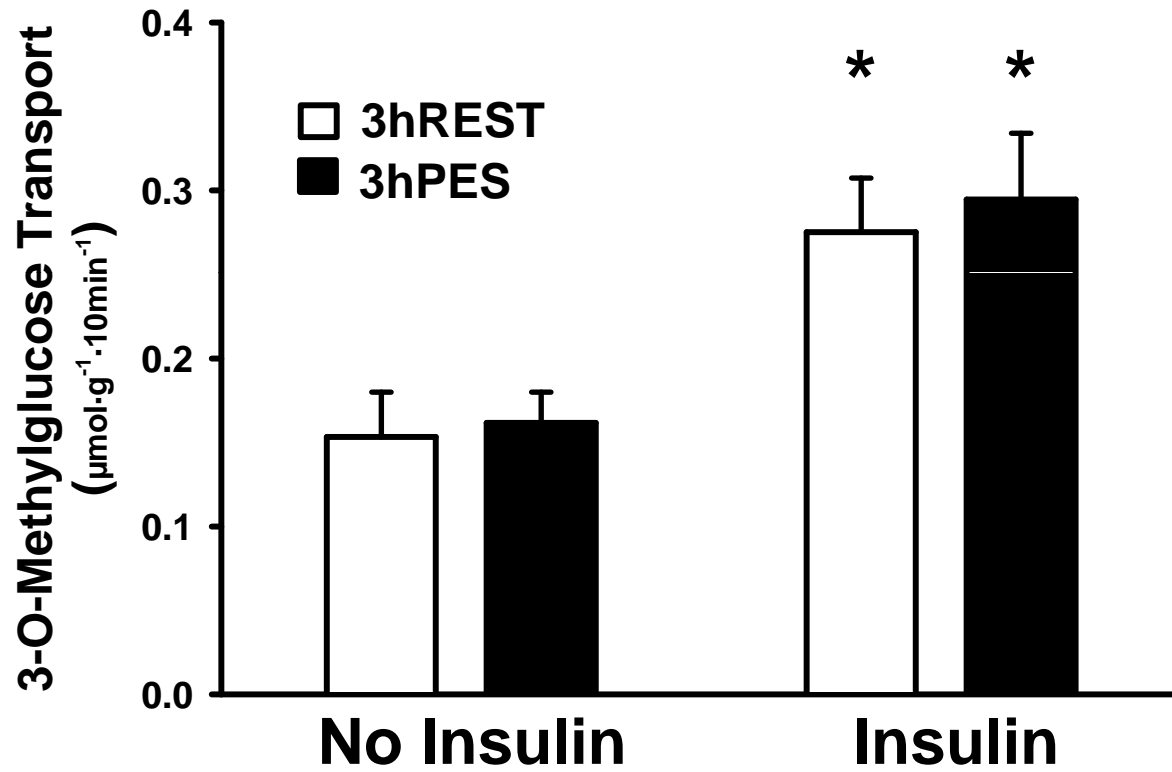

No serum during Steps 1 & 2

**C**

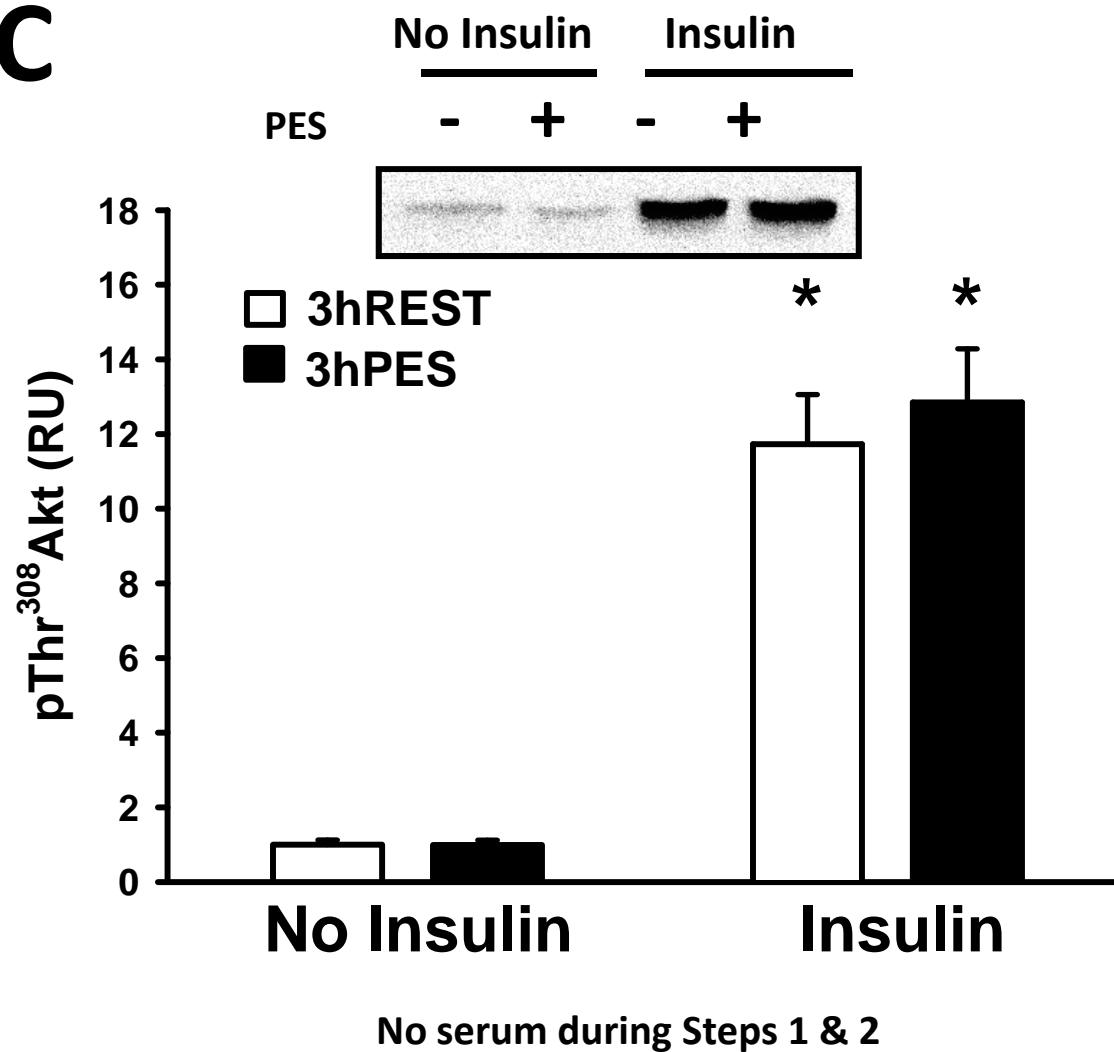

**D**

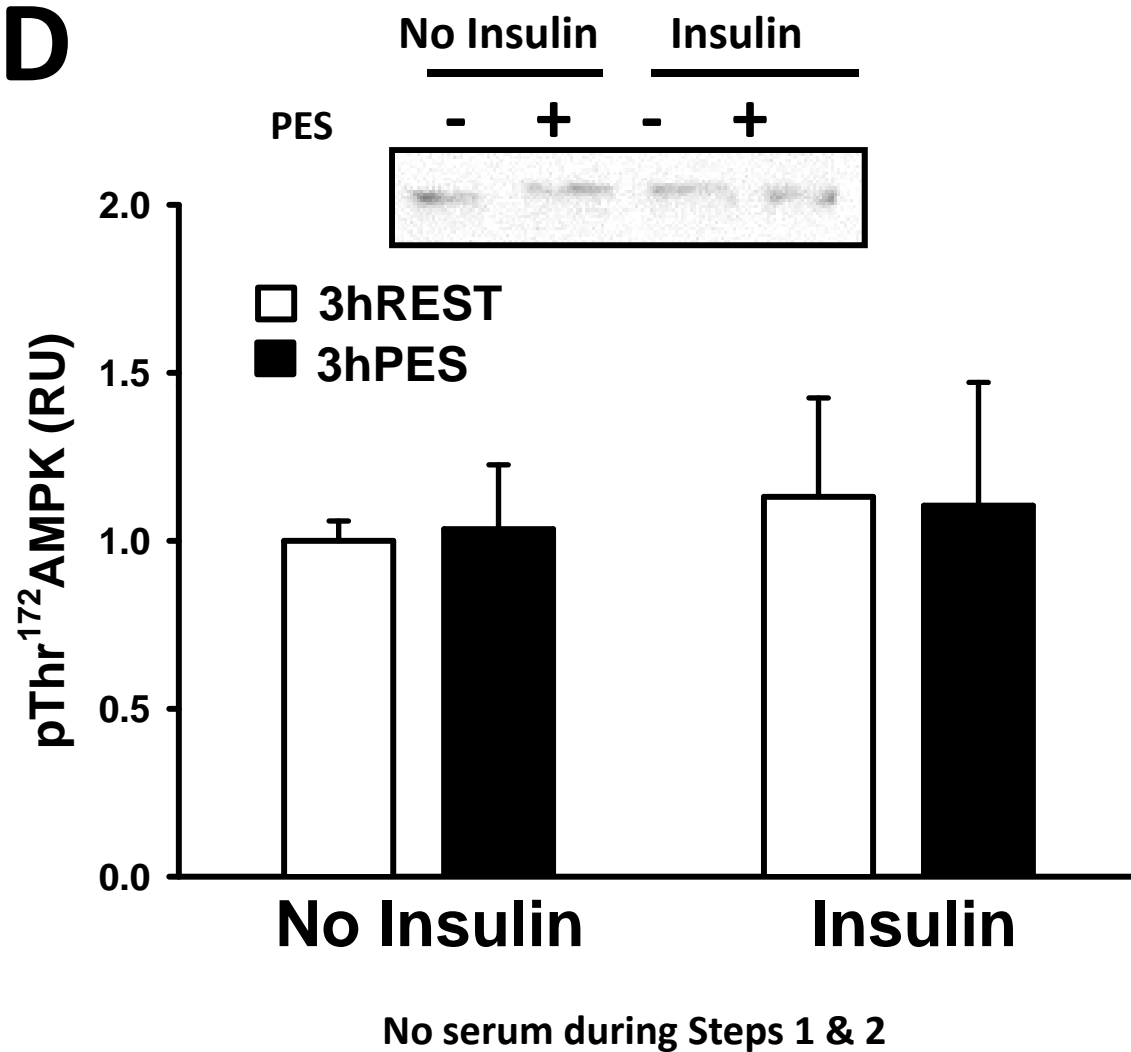

**E**

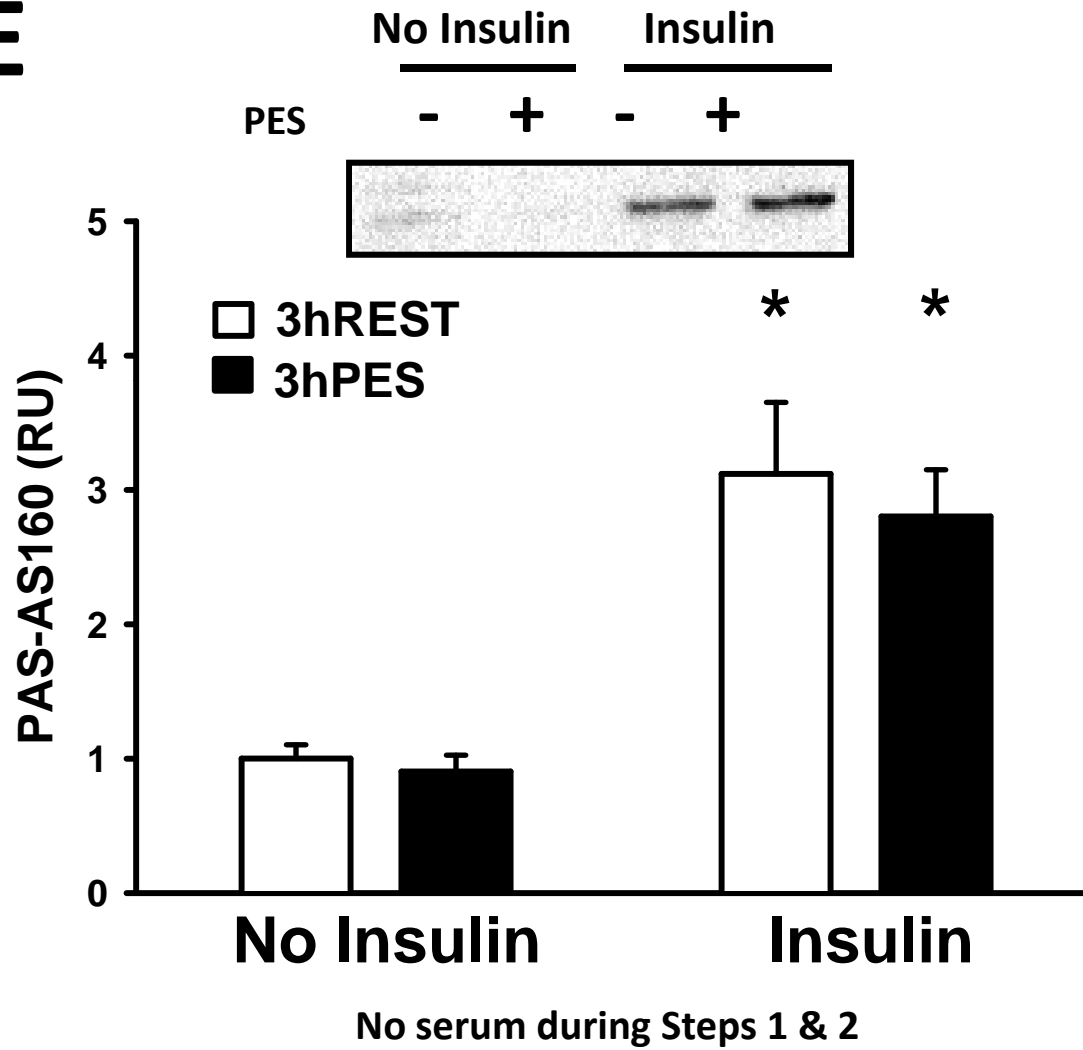

**F**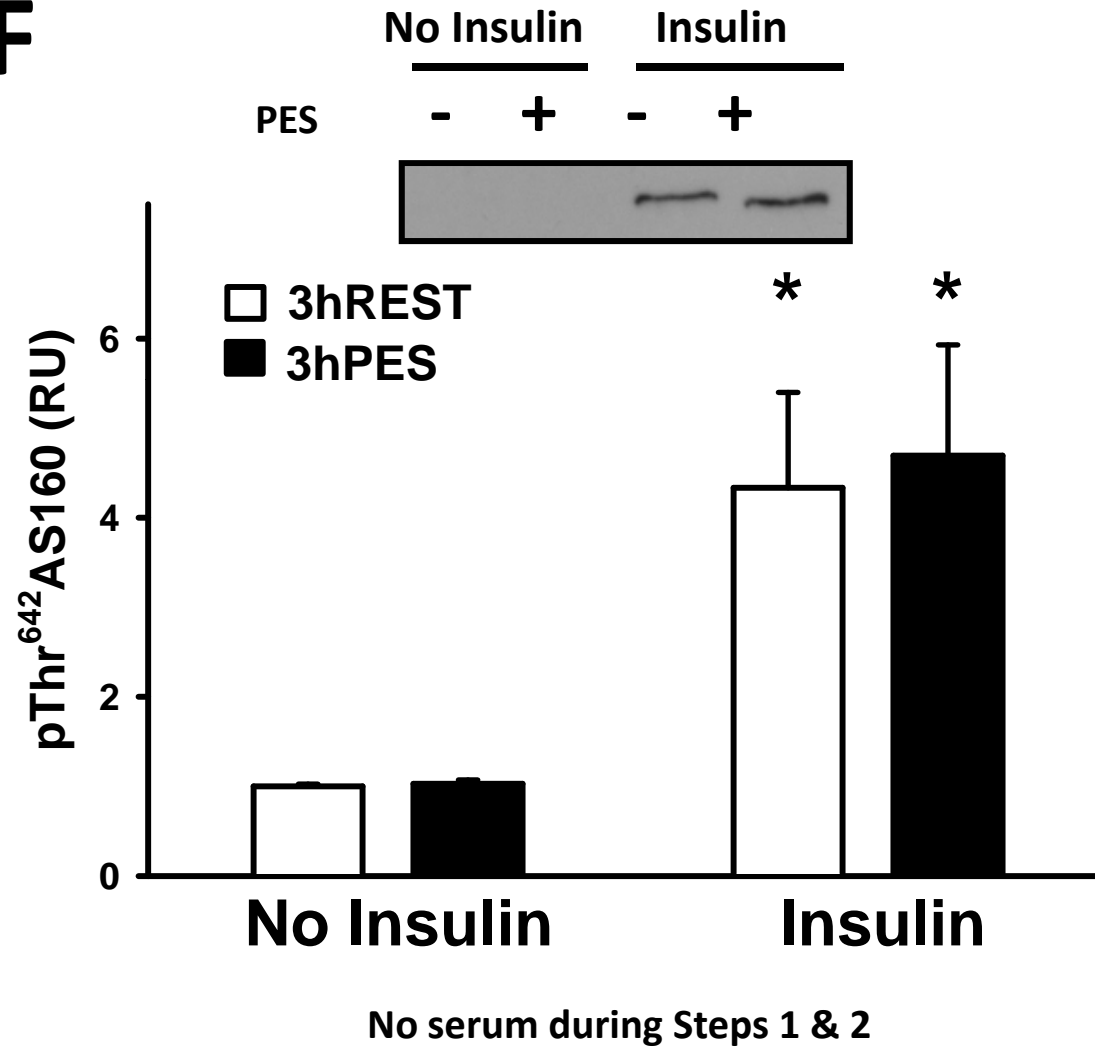

**G**

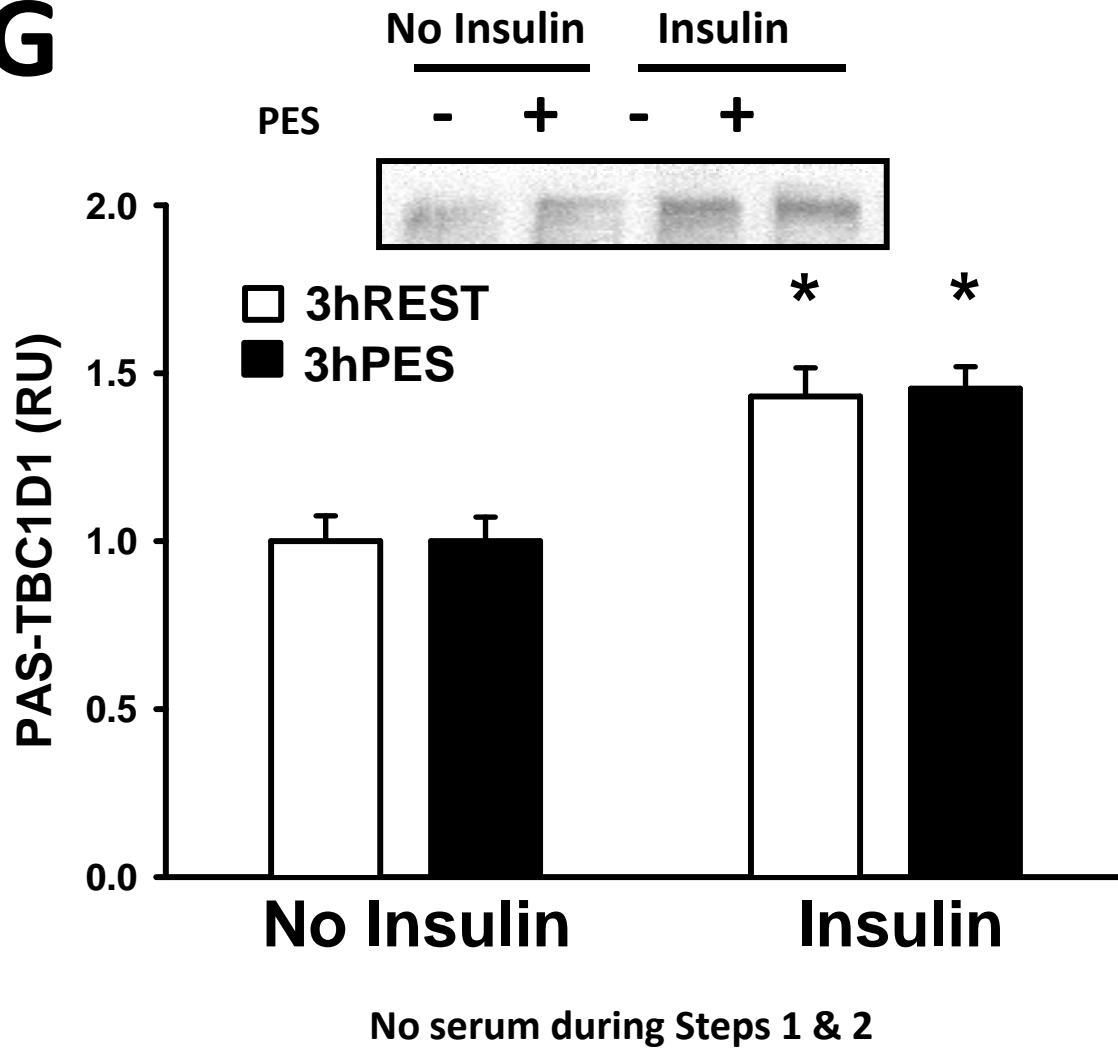

**H**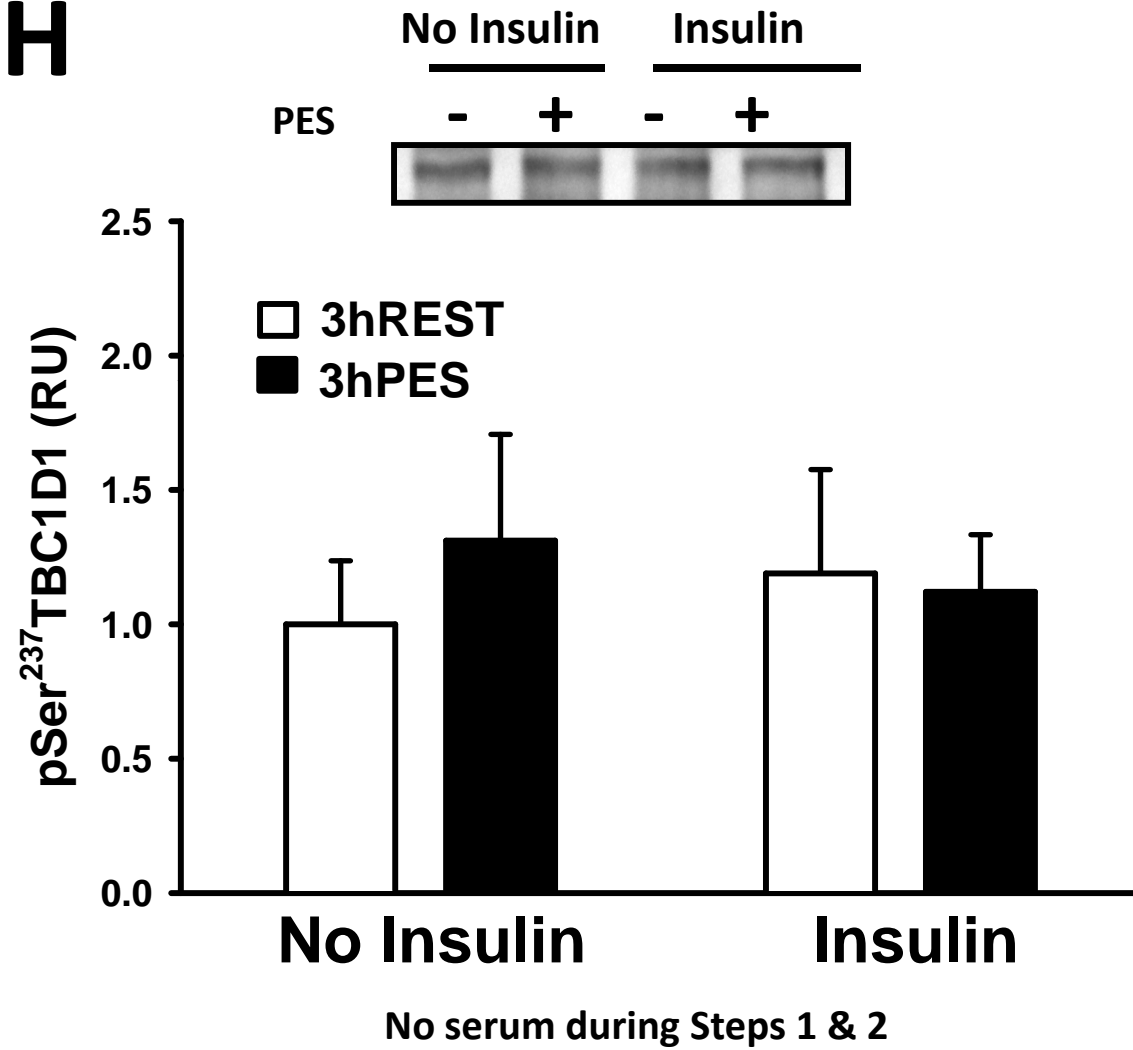

Supplement: 00758.2009_1.pdf [file 00758.2009_1.pdf]
